# Supplementary material for: Decoupling of water and air temperature in winter causes warm season bias of lacustrine brGDGTs temperature estimates
Source: Copernicus journal article supplement (doi:10.5194/bg-2019-507), 2020-02-04
Supplement: Supplementary file [file bg-2019-507-AC1-supplement.pdf]

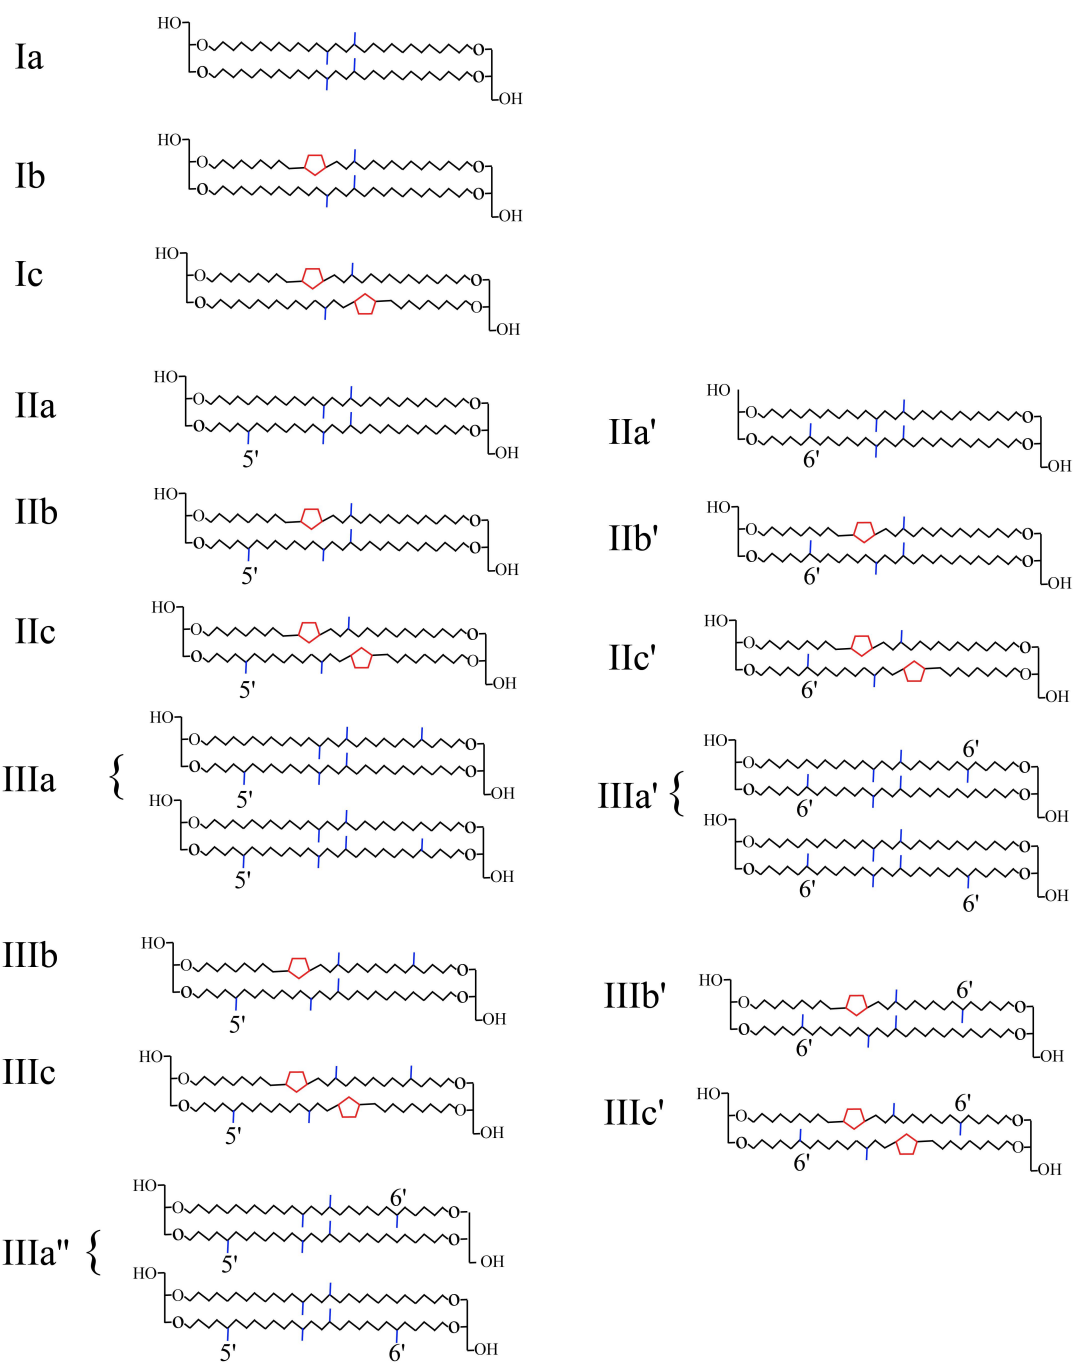

**Appendix 1** Molecular structures of brGDGTs
